# Supplementary material
Source: PubMed Central journal article supplement (PMC2529040)
Supplement: 0801062105_0801062105SI.pdf [file 0801062105_0801062105SI.pdf]

# Supporting Information

Lan *et al.* 10.1073/pnas.0801062105

## SI Text

**CT- $S_0$  Conical Intersection Geometry and g-h Vector.** Tables S1 and S2 give the Cartesian coordinates of the equilibrium configuration of the  $S_0$  state and the conical intersection, respectively. Fig. S1 *a* and *b* show the  $\mathbf{g}$  (gradient difference) and  $\mathbf{h}$  (derivative coupling) vectors, respectively.

**Diabatic Potential-Energy Surfaces.** The diabatic potential-energy surfaces,  $V_{11}$  and  $V_{22}$ , are modeled as a function of the hydrogen-transfer coordinate  $R$  and as harmonic functions of the 19 tuning coordinates  $Q_{t,i}$  and the 19 coupling coordinates  $Q_{c,i}$

$$V_{11} = v_{11}(R) + \sum_i \left[ \frac{1}{2} \omega_{t,i} Q_{t,i}^2 + \kappa_i^{(1)}(R) Q_{t,i} \right] + \sum_j \frac{1}{2} \omega_{c,j} Q_{c,j}^2, \quad [1]$$

$$V_{22} = v_{22}(R) + \sum_i \left[ \frac{1}{2} \omega_{t,i} Q_{t,i}^2 + \kappa_i^{(2)}(R) Q_{t,i} \right] + \sum_j \frac{1}{2} \omega_{c,j} Q_{c,j}^2, \quad [2]$$

where  $\omega_{t,i}$  and  $\omega_{c,i}$  are frequencies of the tuning and coupling modes, respectively.

The coupling element in the diabatic representation is approximated as a linear function of  $Q_{c,i}$ :

$$V_{12} = \sum_i \lambda_i Q_{c,i}. \quad [3]$$

The coupling constants of the tuning modes are obtained as

$$\kappa_i^{(k)}(R) = \sum_m \frac{\delta V_{\kappa}^a(R)}{\delta x_m} \frac{\delta x_m}{\delta Q_{t,i}}, \quad (k = 1, 2). \quad [4]$$

The transformation between the Cartesian coordinates and the dimensionless normal coordinates,  $\frac{\partial X_m}{\partial Q_{ti}}$ , is given by the so-called  $L$  matrix, which can be obtained with the Gaussian package.

Analytic functions  $v_{11}(R)$ ,  $v_{22}(R)$ ,  $\kappa_i^{(1)}(R)$  and  $\kappa_i^{(2)}(R)$  are obtained by fitting the data to a fourth-order polynomial in  $R$

$$v_{11}(R) = A_1 R^4 + B_1 R^3 + C_1 R^2 + D_1 R + E_1, \quad [5]$$

$$v_{22}(R) = A_2 R^4 + B_2 R^3 + C_2 R^2 + D_2 R + E_2, \quad [6]$$

$$\kappa_i^{(1)}(R) = a_i^{(1)} R^4 + b_i^{(1)} R^3 + c_i^{(1)} R^2 + d_i^{(1)} R + e_i^{(1)}, \quad [7]$$

$$\kappa_i^{(2)}(R) = a_i^{(2)} R^4 + b_i^{(2)} R^3 + c_i^{(2)} R^2 + d_i^{(2)} R + e_i^{(2)}. \quad [8]$$

For illustration, the dependences of  $\kappa_i^{(1)}(R)$  and  $\kappa_i^{(2)}(R)$  on  $R$  are shown in Fig. S2*a* for the mode  $\nu_{27}$  ( $\omega_{27} = 0.13683$  eV). The two-dimensional diabatic potential energy surfaces of the  $S_0$  and CT states as function  $R$  and  $Q_{27}$  are shown in Fig. S2*b*.

The diabatic coupling strengths  $\lambda_i$  are obtained by projecting the nonadiabatic coupling vector ( $\mathbf{h}$ ) onto the  $Q_{c,i}$ .

The parameters of the 39-dimensional potential-energy surfaces are available from the authors upon request.

**Spectral-Density Functions.** The discrete spectral densities and corresponding continuous functions for the  $S_0$  and CT states are shown in Fig. S3 *a* and *b*, respectively.

*h* vector

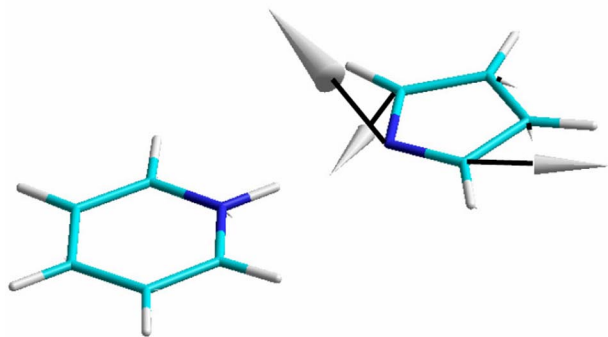

*g* vector

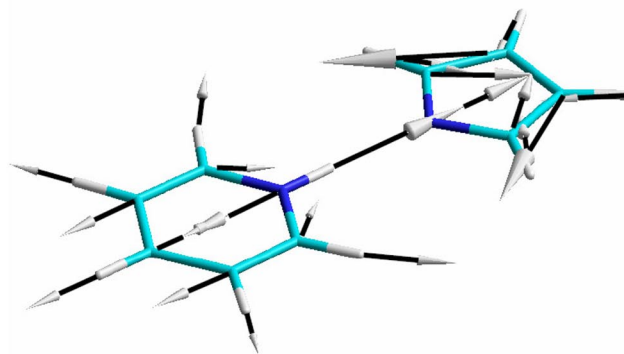

Fig. S1. The *g* and *h* vectors for the CT ( $^1\pi\pi^*$ )- $S_0$  conical intersection.

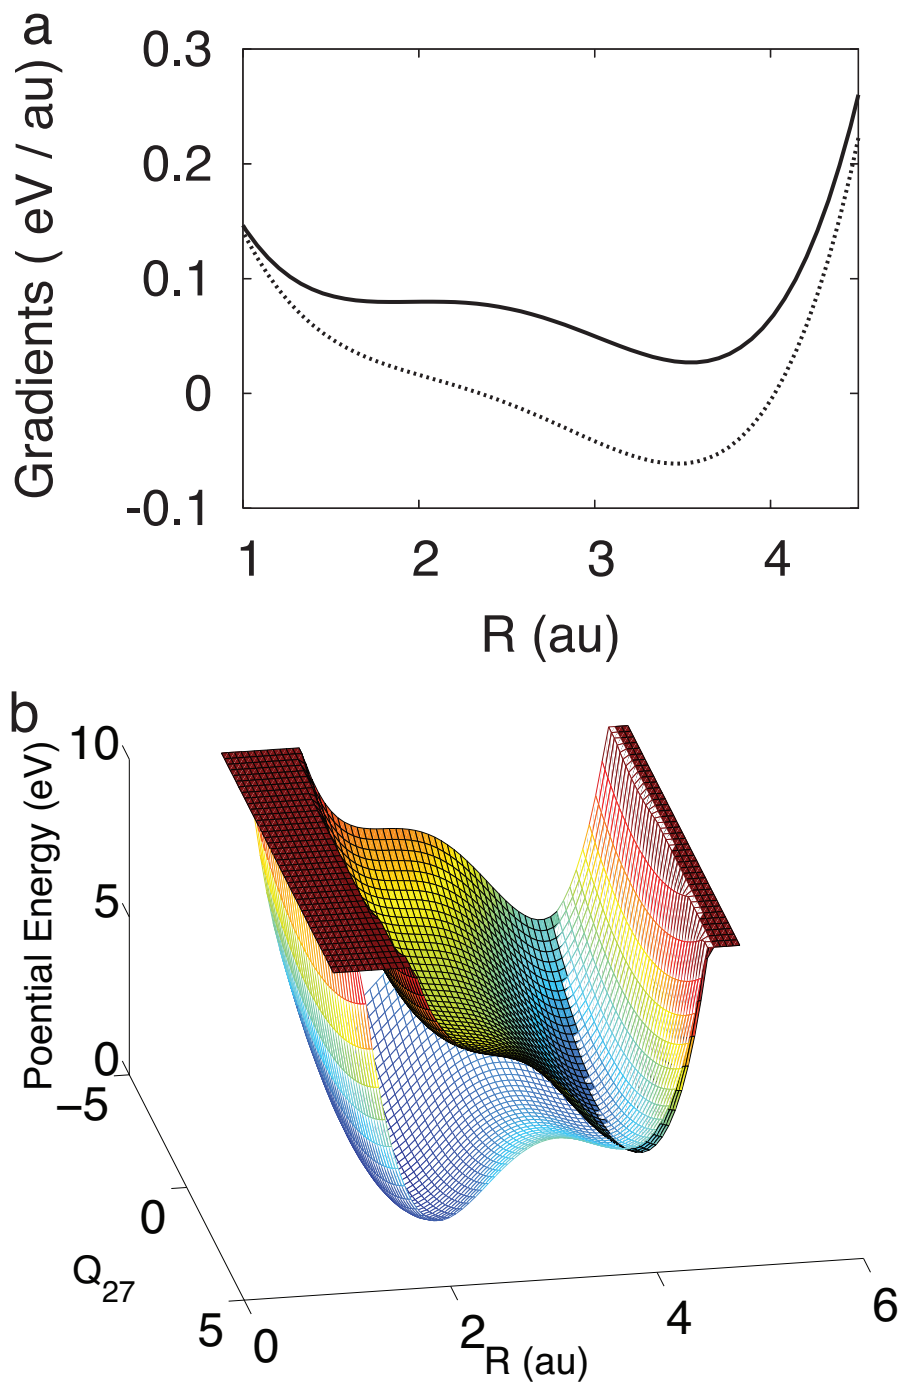

**Fig. S2.** Intrastate coupling strength and potential-energy surfaces for one typical tuning coordinate. (a) The intrastate coupling strengths for mode  $\nu_{27}$  as functions of  $R$ : full line:  $\kappa_{27}^{(1)}$  and the dashed line:  $\kappa_{27}^{(2)}$ . (b) Two-dimensional diabatic potential-energy surfaces of the  $S_0$  and CT ( $1\pi\pi^*$ ) states as function  $R$  and  $Q_{27}$ .

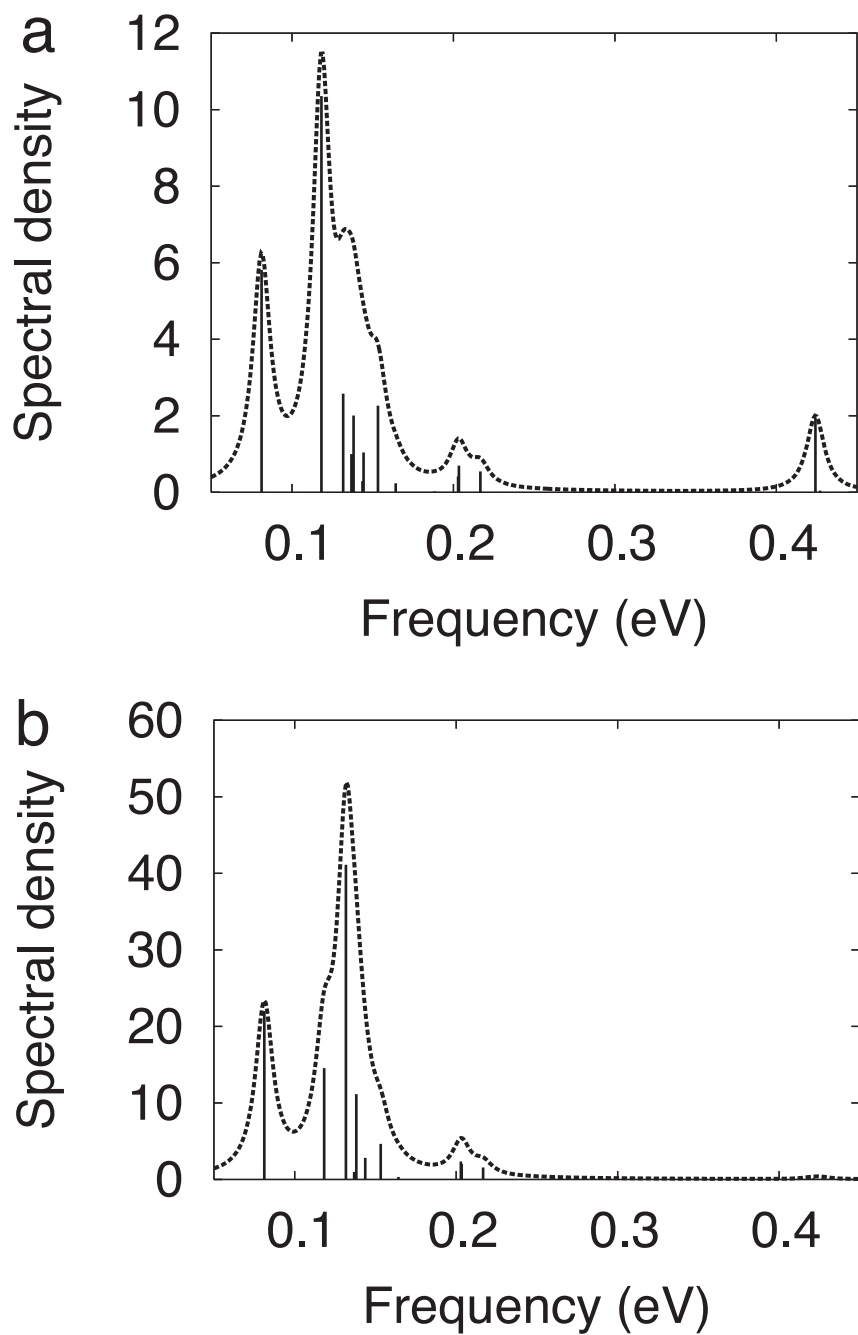

**Fig. S3.** The spectral density functions for the ground  $S_0$  state (a) and the CT ( $1\pi\pi^*$ ) state (b). The sticks give the discrete spectral density. The envelope has been obtained by convolution with a Lorentz function of 13 meV full-width half-maximum.

**Table S1. Cartesian coordinates of the ground-state equilibrium geometry of the pyridine-pyrrole system at the CASSCF level.**

| Atoms | x, Å      | y, Å      | z, Å     |
|-------|-----------|-----------|----------|
| C     | -2.385012 | 2.604117  | 0.000000 |
| N     | -0.198534 | 1.929364  | 0.000000 |
| C     | 0.830327  | 2.826294  | 0.000000 |
| C     | 0.302197  | 4.093008  | 0.000000 |
| C     | -1.118929 | 3.950483  | 0.000000 |
| H     | -2.318032 | 2.079937  | 0.000000 |
| H     | 1.848870  | 2.497866  | 0.000000 |
| H     | 0.858582  | 5.008617  | 0.000000 |
| H     | -1.846051 | 4.737372  | 0.000000 |
| C     | 0.415573  | -4.055235 | 0.000000 |
| C     | -0.848478 | -3.469111 | 0.000000 |
| C     | -0.938623 | -2.077932 | 0.000000 |
| N     | 0.126715  | -1.276273 | 0.000000 |
| C     | 1.334141  | -1.841698 | 0.000000 |
| C     | 1.532040  | -3.221661 | 0.000000 |
| H     | 0.526691  | -5.124215 | 0.000000 |
| H     | -1.741503 | -4.065983 | 0.000000 |
| H     | -1.897711 | -1.592420 | 0.000000 |
| H     | 2.172892  | -1.169334 | 0.000000 |
| H     | 2.528732  | -3.622108 | 0.000000 |
| H     | -0.098797 | 0.935324  | 0.000000 |

**Table S2. Cartesian coordinates of the minimum of the CT-S<sub>0</sub> conical intersection seam at the CASSCF level.**

| Atoms | x, Å      | y, Å      | z, Å     |
|-------|-----------|-----------|----------|
| C     | -1.341586 | 2.574648  | 0.000000 |
| N     | -0.190227 | 1.880509  | 0.000000 |
| C     | 0.794567  | 2.795696  | 0.000000 |
| C     | 0.263848  | 4.146684  | 0.000000 |
| C     | -1.098783 | 4.005669  | 0.000000 |
| H     | -2.293560 | 2.067723  | 0.000000 |
| H     | 1.830194  | 2.494546  | 0.000000 |
| H     | 0.835440  | 5.057343  | 0.000000 |
| H     | -1.844835 | 4.779890  | 0.000000 |
| C     | 0.402478  | -3.967147 | 0.000000 |
| C     | -0.875840 | -3.355783 | 0.000000 |
| C     | -0.988913 | -1.993904 | 0.000000 |
| N     | 0.124447  | -1.195237 | 0.000000 |
| C     | 1.374323  | -1.756914 | 0.000000 |
| C     | 1.533892  | -3.114144 | 0.000000 |
| H     | 0.508910  | -5.028647 | 0.000000 |
| H     | -1.767626 | -3.948203 | 0.000000 |
| H     | -1.929299 | -1.492255 | 0.000000 |
| H     | 2.196329  | -1.078466 | 0.000000 |
| H     | 2.525509  | -3.517828 | 0.000000 |
| H     | 0.025808  | -0.207749 | 0.000000 |
